# Supplementary material for: A one-step sensitive dynamic light scattering method for adenosine detection using split aptamer fragments
Source: Royal Society of Chemistry journal article supplement (doi:10.1039/c0ay00709a), 2010-12-09
Supplement: c0ay00709a.pdf [file c0ay00709a.pdf]

Supplementary Material (ESI) for Analytical Methods

This journal is (c) The Royal Society of Chemistry 2011

## **Supporting Information**

**for**

### **A one-step sensitive dynamic light scattering method for adenosine detection using split aptamer fragments**

Xiaohai Yang, Jiahao Huang, Qing Wang, Kemin Wang\*, Lijuan Yang and Xiqin Huo

*State Key Laboratory of Chemo/Biosensing and Chemometrics, College of Chemistry and*

*Chemical Engineering, Key Laboratory for Bio-Nanotechnology and Molecular Engineering of*

*Hunan Province, Hunan University, Changsha 410082, China. Fax: 86 731 88821566; Tel: 86*

*731 88821566; E-mail: kmwang@hnu.cn.*

## Experimental section

### Reagents

Trisodium citrate and chloroauric acid ( $\text{HAuCl}_4$ ) were obtained from Sinopharm Chemical Reagent Co., Ltd (China). Adenosine, uridine, cytidine and guanosine were purchased from Sigma (USA). Different concentration of adenosine and 1 mM uridine, cytidine, and guanosine were all prepared in 10 mM PBS buffer (pH=7.3). DNA oligonucleotides were purchased from TaKaRa Biotechnology (Dalian, China) Co., Ltd. Sequences of these DNA were as follows: (1) DNA1: 5' -HS-C6- TTT TTT TTT TAC CTG GGG GAG TAT - 3'; (2) DNA2: 5' -HS-C6- TTT TTT TTT TTG CGG AGG AAG GT- 3'; (3) DNA3: 5' -HS-C6- TTT TTT TTT T- 3'. All of them were dissolved into 10 mM PBS buffer (pH=7.3) before use. All of the chemical reagents were of analytical grade or higher. Ultrapure water (18.2 M $\Omega$ ·cm) was used throughout.

### Instruments

UV-visible absorption spectroscopy was recorded on a DU800 Spectrophotometer (Beckman, USA). The hydrodynamic diameters of AuNPs were measured using a Zetasizer Nano ZS from Malvern Instruments (Malvern, UK) under the following conditions: temperature 25 °C, detector angle 173°, incident laser wavelength 633 nm, laser power 4.0 mW. **Transmission electron microscopy (TEM) images were collected by using a JEM 1230 TEM (JEOL, JP).**

## **Preparation and Characterization of AuNPs-DNA**

AuNPs (13±1 nm diameters) were prepared by citrate reduction of HAuCl<sub>4</sub> as previously described.<sup>1</sup> AuNPs-DNA1 and AuNPs-DNA2 were prepared according to the literature with minor modifications.<sup>2, 3</sup> DNA1 (or DNA2) (90 µl, 40 µM) and DNA3 (90 µl, 40 µM) were first mixed with 810 µl AuNPs solution for 16 h at 4 °C, and then the solution was brought to 100 mM NaCl solution (pH 7, 10 mM phosphate buffer) for aging 40 h at 4 °C. The adding of DNA3 blocked the uncovered AuNPs surface. Next, the AuNPs-DNA1 (or AuNPs-DNA2) was centrifugated (30 min, 13,500×g) to remove excess reagents. The supernatant was discarded and the red oily precipitate was washed with 100 mM NaCl solution (pH 7, 10 mM phosphate buffer). After a second centrifugation, the red oily precipitate was dispersed in 500 µl 300 mM NaCl solution (pH 7, 10 mM phosphate buffer). UV-visible absorption spectroscopy was used for optical characterization of AuNPs, AuNPs-DNA1 and AuNPs-DNA2 in solution.

## **Detection of Adenosine**

AuNPs-DNA1 (50 µl, 3.78 nM) and AuNPs-DNA2 (50 µl, 3.78 nM) were first mixed in a 1:1 ratio, and 400 µl different concentration of adenosine was added and reacted for 30 min at room temperature. Finally, the size of nanoparticles in mixture was measured. For identifying the target-specificity of this sensing system, 400 µl 1.0 mM adenosine analogue solutions of uridine, cytidine, and guanosine were, respectively,

reacted with the mixture of AuNPs-DNA1 (50  $\mu$ l, 3.78 nM) and AuNPs-DNA2 (50  $\mu$ l, 3.78 nM) for 30 min at room temperature, then the change of diameter was recorded.

**Table S1.** Comparison of Analytical Performance of Various Different Methods for Determination of adenosine

| Method / technique          | Detection limit (M)  | reference |
|-----------------------------|----------------------|-----------|
| turbidimetry                | $2.5 \times 10^{-4}$ | 4         |
| absorbance spectrum         | $6 \times 10^{-6}$   | 5         |
| colorimetry                 | $2.5 \times 10^{-4}$ | 2         |
| colorimetry                 | $2.5 \times 10^{-4}$ | 6         |
| fluorescent                 | $2 \times 10^{-5}$   | 7         |
| fluorescent                 | $1 \times 10^{-6}$   | 8         |
| fluorescent                 | $1 \times 10^{-7}$   | 9         |
| colorimetry and fluorescent | $5 \times 10^{-5}$   | 10        |
| chronocoulometry            | $1 \times 10^{-7}$   | 11        |
| electrochemical biosensor   | $1 \times 10^{-8}$   | 12        |
| surface plasmon resonance   | $1 \times 10^{-9}$   | 13        |
| dynamic light scattering    | $7 \times 10^{-9}$   | This work |

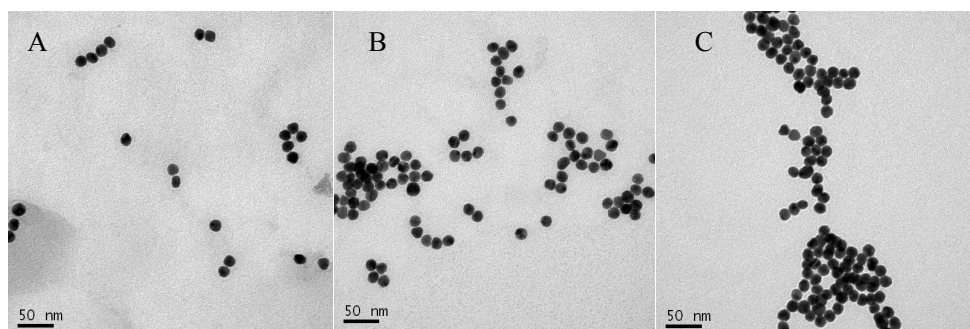

**Figure S1.** (A) TEM image of the mixture of AuNPs-DNA1 and AuNPs-DNA2; (B) TEM image of the aggregation of AuNPs-DNA1 and AuNPs-DNA2 after addition of 0.8  $\mu\text{M}$  adenosine. (C) TEM image of the aggregation of AuNPs-DNA1 and AuNPs-DNA2 after the addition of 80  $\mu\text{M}$  adenosine.

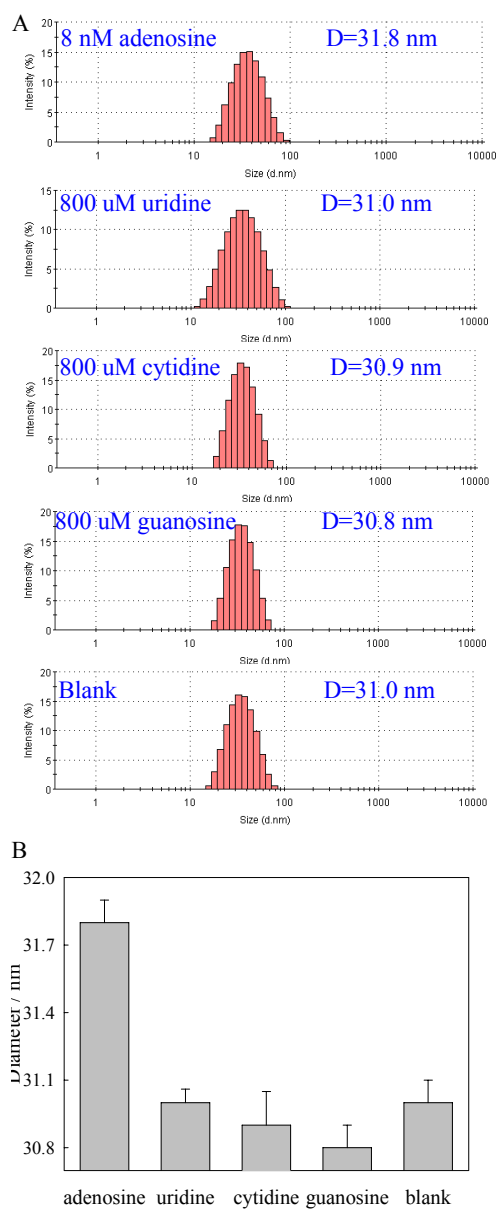

**Figure S2.** DLS analysis data (A) and the change of size (B) of AuNPs-DNA probes in the presence of adenosine and its analogues. The concentration of adenosine analogues was 800  $\mu$ M, while the concentration of adenosine was 8 nM.

## References

---

- <sup>1</sup> G. Frens, *Nat. Phys. Sci.*, 1973, **241**, 20–22.
- <sup>2</sup> F. Li, J. Zhang, X. Cao, L. H. Wang, D. Li, S. P. Song, B. C. Ye and C. H. Fan, *Analyst*, 2009, **134**, 1355–1360.
- <sup>3</sup> Q. Wang, X. H. Yang, K. M. Wang, W. H. Tan and J. Gou, *Analyst*, 2008, **133**, 1274–1279.
- <sup>4</sup> D. Miyamoto, Z. Tang, T. Takarada and M. Maeda, *Chem. Commun.*, 2007, 4743–4745.
- <sup>5</sup> N. Lu, C. Shao and Z. Deng, *Chem. Commun.*, 2008, 6161–6163.
- <sup>6</sup> F. Li, J. Zhang, X. Cao, L. Wang, D. Li, S. Song, B. Ye and C. Fan, *Analyst*, 2009, **134**, 1355–1360.
- <sup>7</sup> W. Xu and Y. Lu, *Anal. Chem.*, 2010, **82**, 574–578.
- <sup>8</sup> Z. Xu, Y. Sato, S. Nishizawa and N. Teramae, *Chem. Eur. J.*, 2009, **15**, 10375–10378.
- <sup>9</sup> Y. Song, C. Zhao, J. Ren and X. Qu, *Chem. Commun.*, 2009, 1975–1977.
- <sup>10</sup> J. Liu, J. H. Lee and Y. Lu, *Anal. Chem.*, 2007, **79**, 4120–4125.
- <sup>11</sup> L. Shen, Z. Chen, Y. Li, P. Jing, S. Xie, S. He, P. He and Y. Shao, *Chem. Commun.*, 2007, 2169–2171.
- <sup>12</sup> Y. Du, B. Li, H. Wei, Y. Wang and E. Wang, *Anal. Chem.*, 2008, **80**, 5110–5117.
- <sup>13</sup> J. Wang and H. S. Zhou, *Anal. Chem.*, 2008, **80**, 7174–7178.
